# Transmission Mode Predicts Specificity and Interaction Patterns in Coral-*Symbiodinium* Networks

Nicholas S. Fabina<sup>1\*</sup>, Hollie M. Putnam<sup>2</sup>, Erik C. Franklin<sup>2</sup>, Michael Stat<sup>2,3,4</sup>, Ruth D. Gates<sup>2</sup>

**1** Department of Evolution and Ecology, University of California Davis, Davis, California, United States of America, **2** Hawaii Institute of Marine Biology, School of Ocean and Earth Science and Technology, University of Hawaii, Kaneohe, Hawaii, United States of America, **3** The UWA Oceans Institute and Centre for Microscopy, Characterisation and Analysis University of Western Australia, Perth, Western Australia, Australia, **4** Australian Institute of Marine Science, The University of Western Australia, Perth, Western Australia, Australia

## Abstract

Most reef-building corals in the order *Scleractinia* depend on endosymbiotic algae in the genus *Symbiodinium* for energy and survival. Significant levels of taxonomic diversity in both partners result in numerous possible combinations of coral-*Symbiodinium* associations with unique functional characteristics. We created and analyzed the first coral-*Symbiodinium* networks utilizing a global dataset of interaction records from coral reefs in the tropical Indo-Pacific and Atlantic Oceans for 1991 to 2010. Our meta-analysis reveals that the majority of coral species and *Symbiodinium* types are specialists, but failed to detect any one-to-one obligate relationships. Symbiont specificity is correlated with a host's transmission mode, with horizontally transmitting corals being more likely to interact with generalist symbionts. Globally, *Symbiodinium* types tend to interact with only vertically or horizontally transmitting corals, and only a few generalist types are found with both. Our results demonstrate a strong correlation between symbiont specificity, symbiont transmission mode, and community partitioning. The structure and dynamics of these network interactions underlie the fundamental biological partnership that determines the condition and resilience of coral reef ecosystems.

**Citation:** Fabina NS, Putnam HM, Franklin EC, Stat M, Gates RD (2012) Transmission Mode Predicts Specificity and Interaction Patterns in Coral-*Symbiodinium* Networks. PLoS ONE 7(9): e44970. doi:10.1371/journal.pone.0044970

**Editor:** Sebastian C. A. Ferse, Leibniz Center for Tropical Marine Ecology, Germany

**Received:** December 30, 2011; **Accepted:** August 16, 2012; **Published:** September 18, 2012

**Copyright:** © 2012 Fabina et al. This is an open-access article distributed under the terms of the Creative Commons Attribution License, which permits unrestricted use, distribution, and reproduction in any medium, provided the original author and source are credited.

**Funding:** Support was provided by the National Science Foundation (OCE-0752604 to RDG; OCE-1041673 to MJD; EF-0928987 to SJS; EF-0553768 to NCEAS; 04-17412 to MCR-LTER; www.nsf.gov), the United States Environmental Protection Agency (FP-917096 to ECF; www.epa.gov), start up funds from the Dean of the College of Biological Sciences to SJS, a postdoctoral fellowship to MS from the AIMS-CSIRO-UWA collaborative agreement, and the University of California Davis Center for Population Biology. The funders had no role in study design, data collection and analysis, decision to publish, or preparation of the manuscript.

**Competing Interests:** The authors have declared that no competing interests exist.

\* E-mail: nsfabina@ucdavis.edu

## Introduction

Scleractinian corals, the foundation of coral reefs, are extremely sensitive to global changes [1,2]. The condition and function of the coral holobiont is intimately tied to the identity of its symbiotic partners, which enhance or constrain coral responses to environmental stressors. Thus, there is an increasing need to study the symbiome – the collection of species with enduring associations within the physical limits of the coral colony [3]. Temperature anomalies are generally believed to present the largest threat to coral persistence [4], as they cause corals to disassociate from their symbiotic partners, particularly when coupled with UV stress [5]. This process leads to coral bleaching and, in extreme or persistent cases, colony mortality.

Most scleractinian corals depend on endosymbiotic dinoflagellates in the genus *Symbiodinium* for nutrition and survival [6]. The coral-*Symbiodinium* association is considered mutualistic, with corals receiving photosynthetic carbon and *Symbiodinium* receiving nitrogen, phosphorus, and carbon dioxide. Indeed, *Symbiodinium* commonly provide a coral with over 90% of its energetic requirements. That said, associations can also be commensalistic, or even antagonistic, depending on partner identity and environmental conditions [7,8,9]. Complicating matters is the diversity present in both guilds: there are hundreds of coral species and *Symbiodinium* types, with known diversity rapidly increasing with

each new field study [10]. Currently, there are nine recognized evolutionary lineages of *Symbiodinium*, clades A through I [11].

*Symbiodinium* clades are thought to have general functional characteristics that affect coral responses to a range of environmental variables. Clade B and D *Symbiodinium* are tolerant of temperature extremes [12], while clade A symbionts produce amino acids that protect against UV radiation [9,13]. Clade D is considered the most tolerant of disturbances and is thought to thrive in marginal environments because of a weedy or opportunistic life history [14]. Indeed, corals with clade D are much more common in thermally disturbed reefs or pools [15,16]. However, there appears to be a tradeoff between short-term responses to temperature anomalies and long-term survival. While clade D continues photosynthesis during and after temperature stress [17], the presence of clade C is correlated with higher relative growth and lower relative mortality, both in juvenile and adult corals [18,19]. Understanding the functional differences between *Symbiodinium* and the implications for coral survival is critical to forecasting coral responses to the increases in anomalous ocean temperatures predicted with climate change.

The potential for corals to respond to environmental changes is a function of partner identity, thus the ability of corals to interact with functionally diverse assemblages of symbionts could enhance their resilience. This line of thinking led to the Adaptive Bleaching Hypothesis [20,21], which posits that under adverse environmen-

tal settings, the ability to interact with diverse partners allows corals to shift (acquire new symbiont partners from the environment) or shuffle (adjust the relative abundances of existing partners) their symbiont assemblages to enhance performance [13]. Indeed, a diverse *Symbiodinium* and microbial assemblage provides more consistent and diverse services in anemones and sponges [22,23].

On the other hand, corals with obligatory symbiotic relationships that are functionally superior may be more environmentally resilient. Corals transmit *Symbiodinium* either vertically, from parent colony to egg or brooded larvae, or horizontally, where propagules or new recruits acquire symbionts from the environment [24]. Vertical transmission is expected to increase symbiotic fidelity due to the coupling of coral and *Symbiodinium* fitness [25]. Thus, corals that transmit symbionts vertically may have more specialized and mutualistic *Symbiodinium*, while horizontally transmitted symbionts may be more generalized and antagonistic [26]. Despite the performance implications of coral specificity and transmission mode, no studies to date have explored the existing coral-*Symbiodinium* association data at multiple spatial scales for specificity or transmission trends.

The fitness of a coral is a function of its potential symbiotic partners, which in turn is a function of community patterns of interaction. To better understand the coral response to stress, it is necessary to address key questions related to the symbiotic unions including: Are corals predominantly specialists interacting with select *Symbiodinium* types, or generalists interacting with diverse groups of symbionts? Likewise, do *Symbiodinium* specialize or generalize in their partnerships with corals? Does symbiont transmission mode affect coral-*Symbiodinium* interaction patterns? One approach to addressing these complex yet fundamental questions in coral biology is network theory. Network theory is a framework for quantifying mutualistic interaction patterns [27,28] and their relationship to community stability [29,30,31]. In mutualistic interaction networks, vertices represent species and edges represent the interaction between those species. Species are then connected if an interaction occurs between any individuals in their populations. We use network theory and general results from existing mutualistic network studies as an approach to understand coral responses to global changes, which are determined by these symbiotic characteristics [9,20].

In this study, we explore coral-*Symbiodinium* associations using a long-term, global database of observed *Symbiodinium* associations. First, we characterize coral and *Symbiodinium* specificity at reef, ocean basin, and global scales. Second, we test whether transmission mode correlates with specificity of either host or symbiont. We additionally show how interaction patterns in coral-*Symbiodinium* networks compare to those in other mutualistic communities, and discuss their connection to community resilience (definitions reviewed in [32]).

## Results

Our analysis of coral-*Symbiodinium* interaction data revealed that there were many specialist coral species and *Symbiodinium* types and few generalists at reef, ocean basin, and global scales (Table 1, Fig. 1) (note that specialist and generalist are relative terms). We then restricted our analyses to the global network of 54 well-sampled corals and their 106 symbiont partners (Tables S1 and S2, Fig. 2; see methods). Grouping of corals into “specificity clusters” based on the number of interactions for a given coral and the mean number of interactions for its associated symbionts, resulted in four specificity clusters: (1) specialist corals with specialist *Symbiodinium*, (2) specialist corals with generalist *Symbio-*

*dinium*, (3) generalist corals with specialist *Symbiodinium*, and (4) intermediate corals with intermediate *Symbiodinium* (Fig. 3a). Corals in each cluster differed in the number of interactions for host and symbiont, as well as the variance in the number of interactions for associated symbionts (Fig. 3b). For example, corals in the specialist-generalist cluster associated with few *Symbiodinium* types, which interacted with many other hosts on average. Corals in the generalist-specialist cluster associated with many specialist symbionts, which had few alternative hosts. Corals in the former group interacted with both extreme specialists and extreme generalists, while corals in the latter group interacted only with specialists. Tantalizingly, there appeared to be two main strategies: (1) having many indirect interactions with other corals (through shared symbionts) on a gradient ranging through all of the generalist options, versus (2) having few indirect interactions with other corals and associating in a tight specialist-specialist interaction (Fig. 3a). Notably, there were no obligate relationships between a single coral species and a single *Symbiodinium* type at the global level.

The mean number of interactions for a coral’s associated *Symbiodinium* was correlated with that coral’s transmission mode (see partition in Fig. 3a). Corals that interact with specialist symbionts on average (symbionts with fewer than ~14 coral hosts) were almost always vertical transmitters, while corals that interact with generalist symbionts on average (symbionts with more than ~14 coral hosts) were almost always horizontal transmitters (Wilcoxon;  $W = 377$ ,  $m_{\text{vert}} = 9.11$ ,  $m_{\text{horiz}} = 21.81$ ,  $n_{\text{vert}} = 11$ ,  $n_{\text{horiz}} = 35$ ,  $p = 2.14 \times 10^{-6}$ , two-tailed). We explored the interaction preferences for *Symbiodinium* in the global network by comparing their realized and expected number of interactions with horizontally transmitting corals based on proportion of horizontal transmitters in the community. *Symbiodinium* types interacted with either horizontal or vertical transmitters much more than expected, and most symbionts interacted with only one group (Fig. 4a). Indeed, 46% of all *Symbiodinium* types in the dataset were found exclusively in vertical transmitters and 41% in horizontal transmitters. Generalist symbionts were much more likely to interact with both horizontal and vertical transmitters (Fig. 4b), while symbionts that were found only in horizontal or vertical transmitters were specialists. Vertically transmitting corals and horizontally transmitting corals had no appreciable difference in their mean number of interactions, despite the differences in their symbionts’ mean number of interactions (Wilcoxon;  $W = 139$ ,  $m_{\text{vert}} = 8.91$ ,  $m_{\text{horiz}} = 6.77$ ,  $p = .17$ , two-tailed).

We explored a few common, unweighted network metrics to compare coral-*Symbiodinium* networks to other mutualistic networks (Table 1; see methods). The global network of well-sampled corals species had few realized interactions relative to the number of potential interactions (connectance = .07), had many more symbiont types than host species (web asymmetry = -.33), and was significantly nested ( $N^*_1 = 1.07$ ,  $N^*_2 = .47$ , see Table 1). The ocean basin networks were also poorly connected and significantly nested, but the central and western Indo-Pacific had more coral species than symbiont types. Most reef-level networks (87.5%) had more coral (animal) species than *Symbiodinium* (plant) types, which, like animal-dominated pollination networks, seems to differ from many seed-dispersal and ant-myrmecophyte networks [33]. Reef-level nestedness values (a measure of order) were not significant when compared to nestedness values generated with null models 1 and 2. Only 46% of reefs were significantly nested under null model 1 and 33% were significantly nested under null model 2.

**Table 1.** Basic measures of coral-Symbiodinium communities at reef, ocean basin, and global scales.

| Country        | Community         | Coral | Sym | Asym  | Edge | Conn | Nest  | N <sub>1</sub> | N <sub>2</sub> | Refs |
|----------------|-------------------|-------|-----|-------|------|------|-------|----------------|----------------|------|
| Australia      | Curaçao Island    | 34    | 8   | 0.62  | 55   | 0.20 | 16.24 | -0.05          | -0.27          | 1    |
| Australia      | Feather Reef      | 74    | 17  | 0.63  | 125  | 0.10 | 20.96 | 1.43***        | 0.55**         | 1    |
| Australia      | Heron Island      | 72    | 35  | 0.35  | 118  | 0.05 | 17.28 | 3.16***        | 0.93***        | 5    |
| Australia      | One Tree Island   | 10    | 14  | -0.17 | 21   | 0.15 | 9.93  | -0.22          | -0.31          | 1    |
| Australia      | Rib Reef          | 73    | 19  | 0.59  | 100  | 0.07 | 16.89 | 2.04***        | 0.81**         | 1    |
| Australia      | Western Australia | 20    | 28  | -0.17 | 55   | 0.10 | 12.68 | 0.34           | 0.10           | 2    |
| Bahamas        | Exuma Islands     | 16    | 15  | 0.03  | 28   | 0.12 | 10.07 | -0.03          | -0.14          | 4    |
| Barbados       | Eastern Caribbean | 30    | 28  | 0.03  | 81   | 0.10 | 20.20 | 1.01***        | 0.51**         | 1    |
| Belize         | Carrie Bow        | 39    | 33  | 0.08  | 74   | 0.06 | 10.21 | 0.90***        | 0.48*          | 2    |
| Japan          | Zamami Island     | 51    | 15  | 0.55  | 73   | 0.10 | 15.06 | 0.98***        | 0.41*          | 1    |
| Mexico         | La Paz            | 11    | 10  | 0.05  | 34   | 0.31 | 36.75 | 0.15           | -0.06          | 2    |
| Mexico         | Puerto Morelos    | 31    | 20  | 0.22  | 59   | 0.10 | 17.32 | 0.93***        | 0.47*          | 2    |
| Tanzania       | Banda Kuu         | 56    | 24  | 0.4   | 126  | 0.09 | 16.90 | 0.81***        | 0.12           | 1    |
| Tanzania       | Bawe              | 29    | 15  | 0.32  | 64   | 0.15 | 18.00 | 0.23           | -0.06          | 1    |
| Tanzania       | Changuu           | 34    | 20  | 0.26  | 70   | 0.10 | 11.00 | 0.09           | -0.23          | 1    |
| Thailand       | Cape Panwa        | 63    | 16  | 0.59  | 171  | 0.17 | 40.17 | 1.30***        | 0.46***        | 1    |
| Thailand       | Hae               | 54    | 11  | 0.66  | 84   | 0.14 | 1.70  | -0.85          | -0.88          | 1    |
| Thailand       | Phiphi Don        | 76    | 10  | 0.77  | 144  | 0.19 | 10.31 | -0.40          | -0.55          | 1    |
| Thailand       | Phiphi Lae        | 53    | 12  | 0.63  | 119  | 0.19 | 21.36 | 0.18           | -0.18          | 1    |
| Thailand       | Racha             | 51    | 14  | 0.57  | 90   | 0.13 | 3.82  | -0.66          | -0.74          | 1    |
| Thailand       | Similan           | 54    | 15  | 0.57  | 102  | 0.13 | 7.53  | -0.35          | -0.53          | 1    |
| United States  | Florida Keys      | 13    | 10  | 0.13  | 33   | 0.25 | 41.36 | 0.62**         | 0.31           | 5    |
| United States  | Oahu              | 21    | 18  | 0.08  | 39   | 0.10 | 8.54  | -0.10          | -0.26          | 1    |
| United States  | US Virgin Islands | 9     | 10  | -0.05 | 29   | 0.32 | 51.19 | 0.54**         | 0.31           | 1    |
| C. Indo-Pacif. |                   | 164   | 67  | 0.42  | 355  | 0.03 | 25.53 | 7.02***        | 1.95***        | 8    |
| W. Indo-Pacif. |                   | 168   | 50  | 0.54  | 512  | 0.06 | 31.92 | 3.91***        | 1.11***        | 1    |
| Trop. Atlantic |                   | 46    | 57  | -0.11 | 176  | 0.07 | 18.73 | 1.61***        | .76***         | 9    |
| Global         | All data          | 313   | 174 | 0.29  | 1060 | 0.02 | 22.81 | 9.73***        | 2.14***        | 21   |
| Global         | Well-sampled      | 54    | 106 | -0.33 | 381  | 0.07 | 14.86 | 1.05***        | .46***         | 21   |

Coral = number of coral species; sym = number of *Symbiodinium* types; asym = web asymmetry; edge = number of edges or interactions; conn = connectance; nest = nestedness (NODF); N<sub>1</sub> = relative nestedness (model 1); N<sub>2</sub> = relative nestedness (model 2); refs = number of references. Significance values:

\*\*\*<.001;

\*\*<.01;

\*<.05.

doi:10.1371/journal.pone.0044970.t001

## Discussion

We explored a global compilation of coral-Symbiodinium interactions [34], and found that both corals and *Symbiodinium* were composed of many specialists and few generalists. Further, we found that symbiont transmission mode was correlated with mean *Symbiodinium* partner specificity, and not coral specificity. Communities were generally partitioned between vertically transmitting corals and their symbiont partners.

Coral species with the potential to interact with functionally diverse *Symbiodinium* assemblages are hypothesized to be more responsive to global changes, i.e., the Adaptive Bleaching Hypothesis. Mutualistic network studies in other systems, such as pollination and seed-dispersal communities, find consistent network characteristics and correlations with resilience. In particular, generalists should be more resilient to disturbances than specialists. Thus, interpreting our results under the assumption that the ability to interact with functionally diverse

*Symbiodinium* assemblages is beneficial, or with previous network findings in other ecosystems, leads to the same conclusion. Such patterns would suggest that *Pocillopora damicornis* and *Stylophora pistillata*, the two most generalist coral species in the global network, would be more resilient species and communities with many generalist species would be the most resilient.

However, it is also possible that the high degree of intimacy in these symbioses maximizes fitness through the co-evolution of high-fidelity partners [35]. Tight functional integration may increase the range of environmental conditions in which a partnership is stable and stress resistant. Recent evidence [36] links generalist corals, such as *Acropora* and *Pocillopora*, to greater environmental sensitivity than specialists [37,38], and suggests that corals with symbiotic specialization (e.g., massive *Porites*; [39]) may be more resilient to contemporary stressors [40]. Vertical symbiont transmission also results in lower variation in partnerships between generations, and greater potential for co-evolution and increasing levels of symbiotic integration [26]. Corals that are both specialists

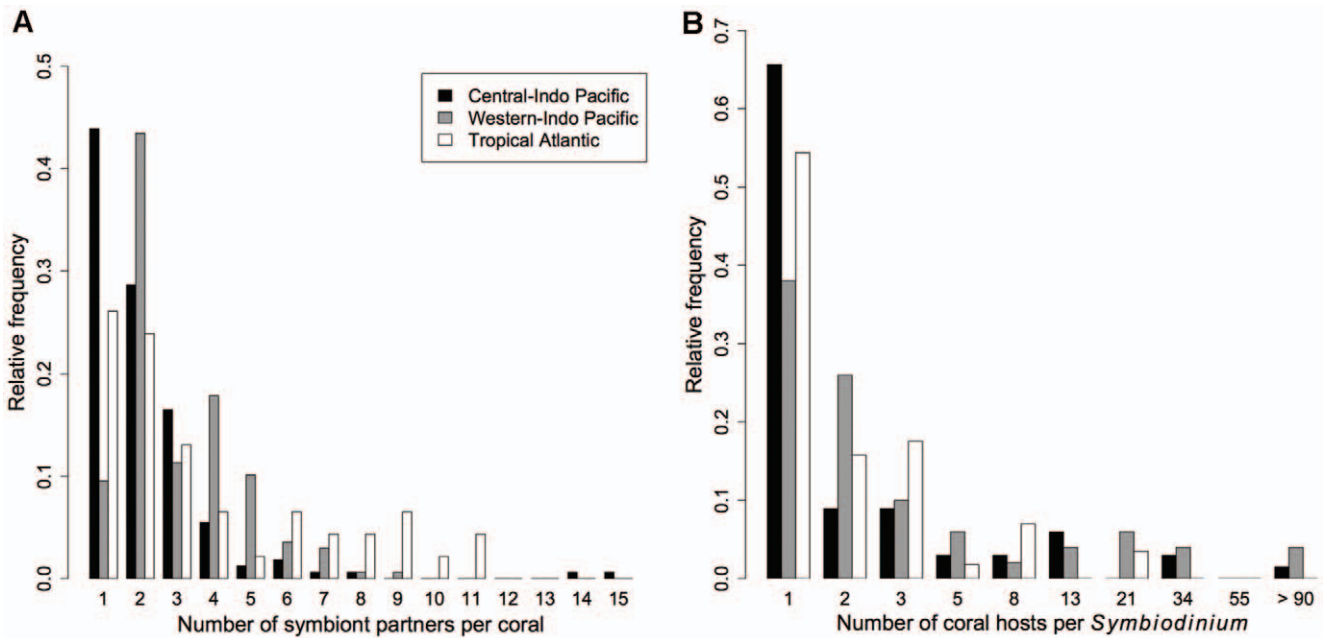

**Figure 1. Degree (number of interactions) distributions for (a) coral and (b) *Symbiodinium* in the biogeographic realms of the central Indo-Pacific, western Indo-Pacific, and tropical Atlantic.** Each group has many specialists and few generalists. *Symbiodinium* interaction numbers are logarithmically binned.  
doi:10.1371/journal.pone.0044970.g001

and vertical transmitters, such as *Porites lobata* and *Montipora digitata*, would then have more resilient populations.

Community resilience is also dependent on symbiont functional characteristics. For example, *Symbiodinium* types vary in their effects

on coral growth rate [18,19], carbon fixation and photosynthate transfer [8,19]. Further, a coral’s ability to cope with environmental stressors, such as temperature anomalies, is related to symbiont identity [12,14,15]. Thus, *Symbiodinium* vary in the

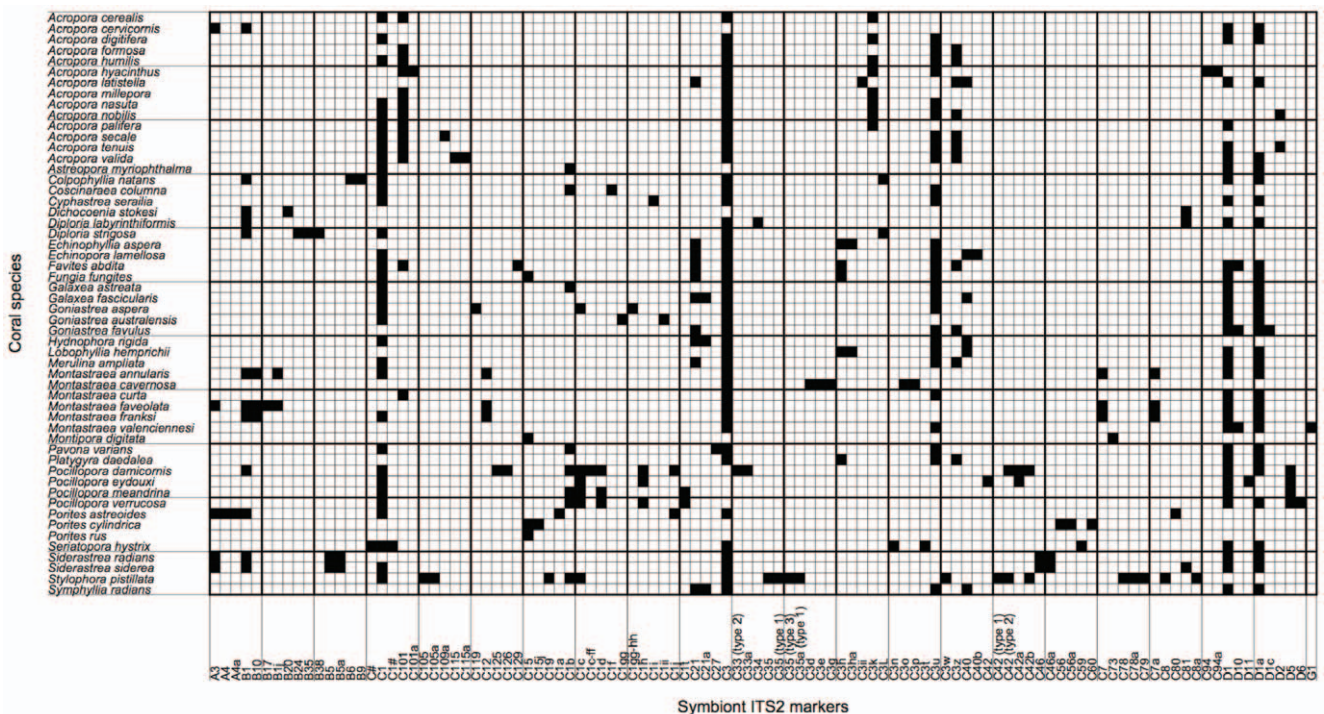

**Figure 2. A matrix representation of the well-sampled global network of corals and *Symbiodinium*.** Black or filled elements denote interactions that have been observed (e.g., between *Acropora cervicornis* and type A3), while white or empty elements denote interactions that have not been observed (e.g., between *Acropora cervicornis* and type A4).  
doi:10.1371/journal.pone.0044970.g002

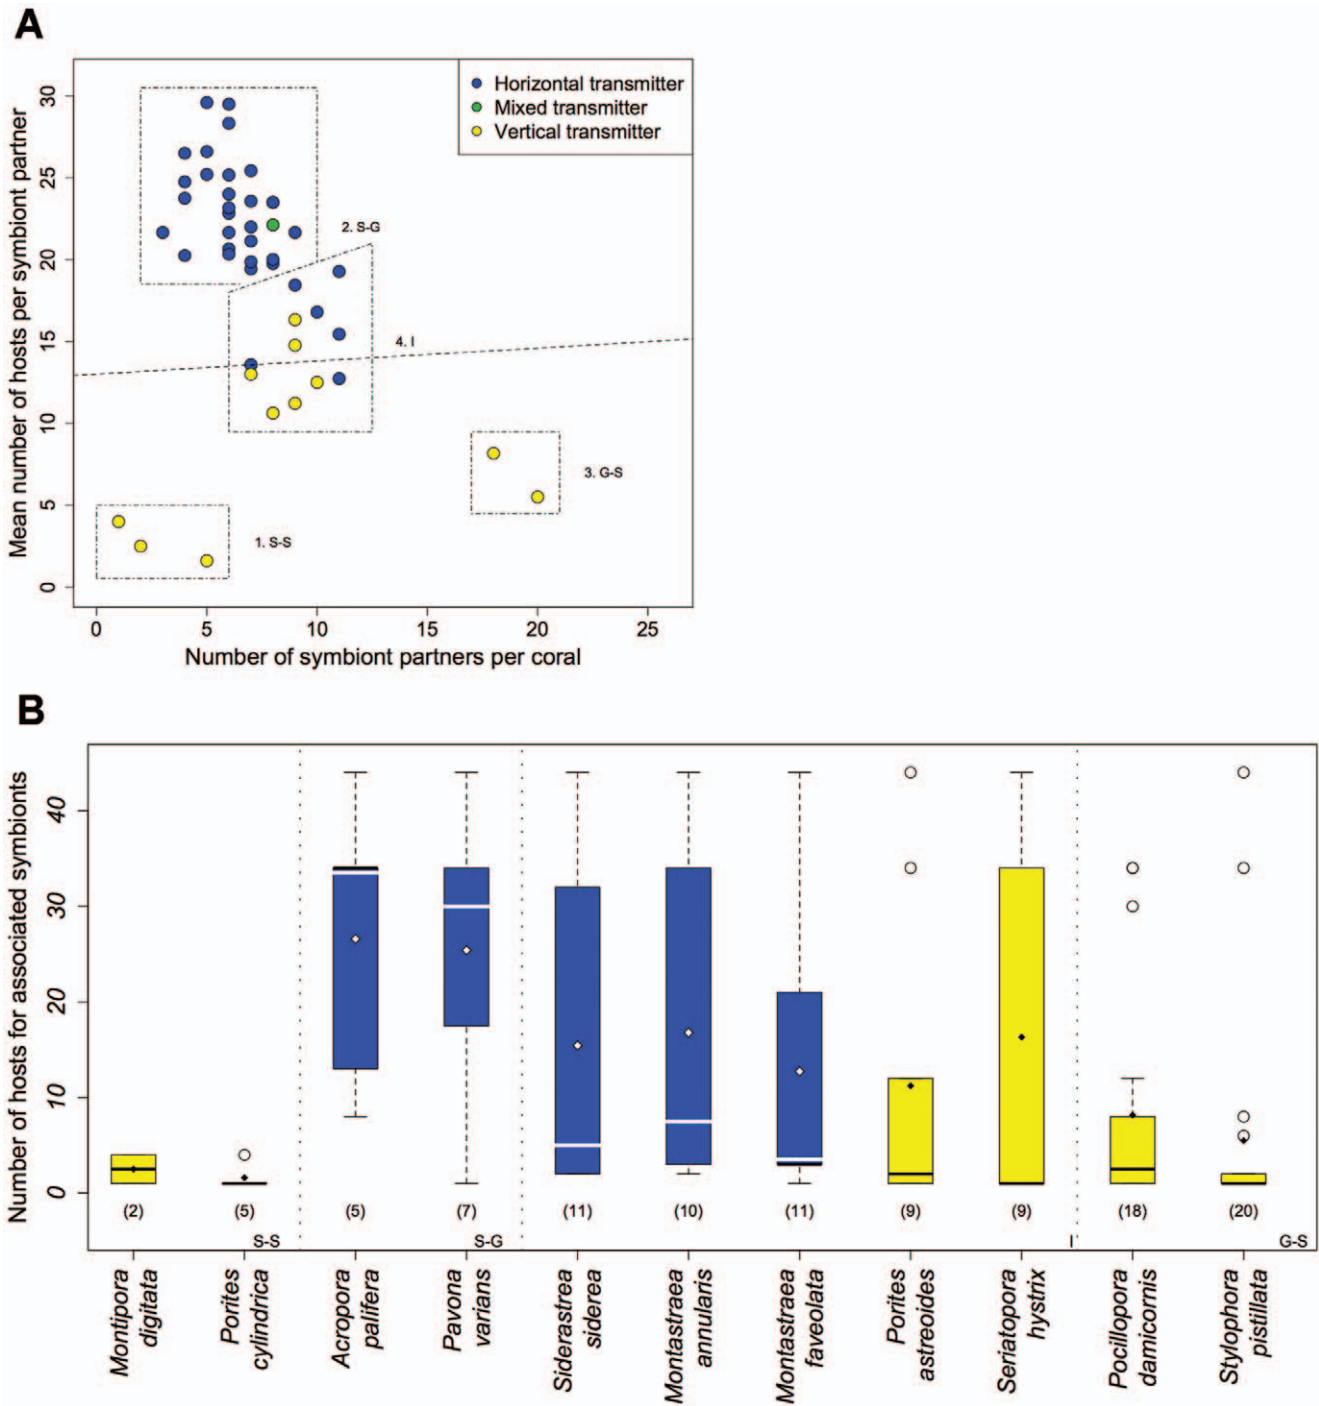

**Figure 3. Relationships between symbiont transmission mode and specificity in the well-sampled global network of 54 coral species and 106 *Symbiodinium* types.** (a) The number of interactions for coral species and the mean number of interactions for their *Symbiodinium* partners. The nearly horizontal, dashed line is the statistical partition between horizontally and vertically transmitting corals. K-means cluster numbering corresponds with text description. (b) Boxplot showing variance in symbiont specificity for well-sampled corals in each cluster. Each coral has at least 30 interaction records and colors are consistent with (a). The number of symbiont partners per coral are in parentheses. doi:10.1371/journal.pone.0044970.g003

benefit they provide to their hosts depending on the community composition and environmental conditions. Unfortunately, not enough is known about symbiont functional characteristics to include this in our analysis [9]. Nonetheless, differences between *Symbiodinium* types and unique coral-*Symbiodinium* pairings are certain to make coral resilience a function of both the number and

diversity of symbiont partners. While we have quantitatively described the association potential of numerous coral species, definitively answering the resilience question is beyond the scope of our study and requires further investigation into functional response at *Symbiodinium* type level.

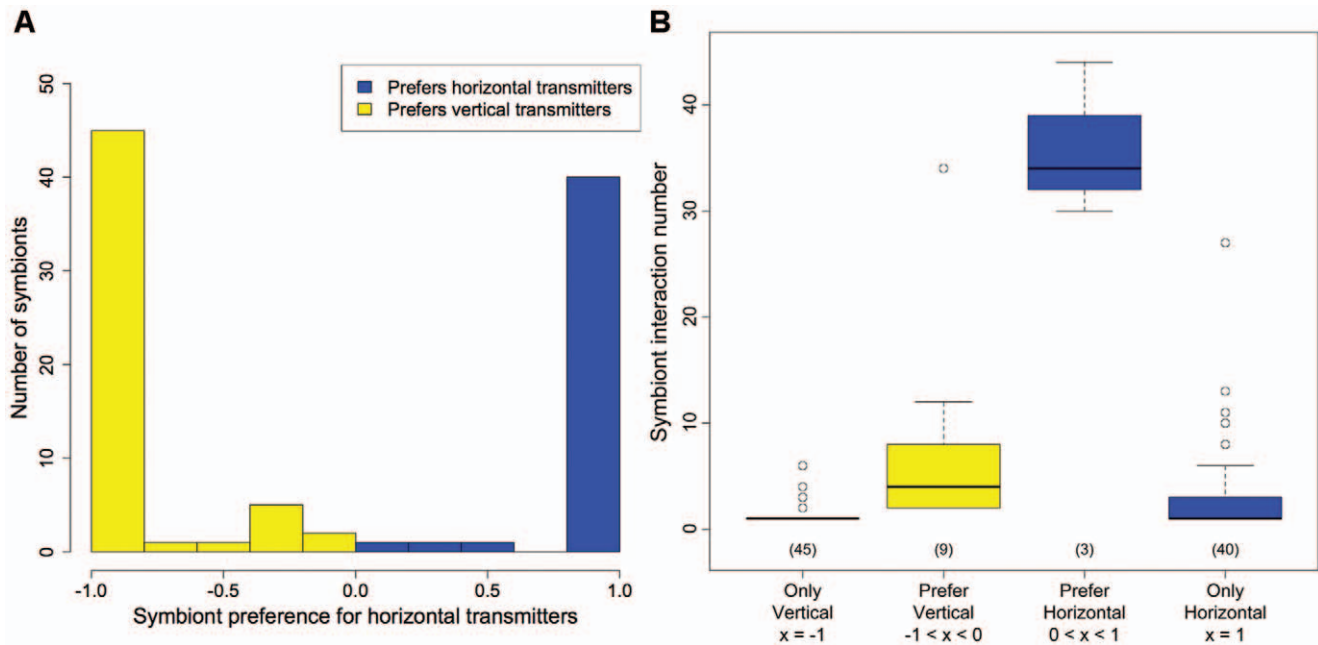

**Figure 4. The relationship between *Symbiodinium* interaction numbers and preference for horizontally or vertically transmitting corals.** (a) Symbiont preferences for (positive values) or against (negative) horizontally transmitting corals versus vertically transmitting corals. Zero indicates no preference, while 1 and  $-1$  indicate coral hosts are only horizontal or vertical transmitters, respectively. (b) From left to right, symbionts which only interacted with vertical transmitters, interacted preferentially with vertical transmitters, interacted preferentially with horizontal transmitters, or only interacted with horizontal transmitters ( $x = k_{diff}$ ). Numbers in parentheses indicate sample size in each group. doi:10.1371/journal.pone.0044970.g004

Our results provide evidence that contrasts with previous thoughts about coral-*Symbiodinium* relationships. First, many authors have suggested that corals are strict specialists due to the evidence that corals at local scales seem to interact with only one symbiont type [40, 41, but see [42]]. Our results show that coral species have the potential to interact with many types (Fig. 3) and local specificity may be due to sampling methodology, or the limited spread of symbiont types (suggested by [13]). Notably, we found no obligate relationships between a coral species and a symbiont type at global scales. *Porites rus* was the only well-sampled coral to host a single symbiont type at global scales, but C15, its symbiont partner, has many alternative hosts. Second, previous authors have also suggested that vertically transmitting corals may be more specialist [13] and we provide evidence that coral specificity is unrelated to transmission mode (although it is related to symbiont specificity) (Fig. 3). Third, Wicks *et al.* [43] suggest that vertically and horizontally transmitting corals share symbionts, but it appears that symbionts are strongly partitioned (Fig. 4). Finally, previous studies suggest that vertically and horizontally transmitting corals have equivalent symbiont diversity at local scales [42]. In contrast, we find that there are many more recognized *Symbiodinium* types transmitted in vertically transmitting corals (Fig. 4a). Our results are consistent with the findings of Stat *et al* [44] on a local scale in the southern Great Barrier Reef, perhaps because vertical transmission promotes diversification via isolation and maintained associations. These results suggest that future research should discern which patterns represent true barriers to association and which reflect biogeographic distributions (and thus the difference between a global or local perspective).

Our results are a product of a still incomplete understanding of coral-*Symbiodinium* interactions and symbiont diversity. *Symbiodinium* types have been described using several markers (nrDNA, rSSU, PLSU, ITS-1 and 2) and methodologies (DGGE, RFLP,

SSCP, bacterial cloning, and direct sequencing) [13]. The range of methods makes it difficult to create a comprehensive phylogeny within clades, and the identity, number, and ecological meaning of types is sometimes disputed [45,46,47]. Researchers generally recognize DGGE ITS-2 types as identifying dominant *Symbiodinium* types, and our methods were chosen according to this interpretation. While our study provides new insights on data already collected, the next step is to use detailed high-resolution datasets to explore the sensitivity of our results to more detailed interaction data. Indeed, although we have the ability to create reef and ocean basin networks with GeoSymbio, we were forced to restrict most of our analyses to the global network of well-sampled coral species. Sampling intensity is variable between reefs and ocean basins and many network analyses are sensitive to species diversity or missing links.

Further studies with rigorous sampling designs will provide the detail necessary to explore the conservation implications of these patterns. Our dataset is an aggregation of coral-*Symbiodinium* interactions compiled across time and space [34] and from different researchers employing a variety of methodological approaches. However, we focus our analyses on the most well-sampled coral species. Our qualitative results differ only when severely undersampled species are included, and only affect the partition found in Fig. 3a. All other qualitative results are robust and increasing the number of samples or references needed for data inclusion only strengthens the observed patterns. However, certain network metrics are sensitive to species diversity, rare interactions, and other phenomena [48,49,50] and future work is needed to include more sampling information and construct specific experiments designed to test network hypotheses. Based on these early results, the combination of network analyses with ecological, evolutionary, and environmental data appears to be a

powerful quantitative approach for analyzing relationships between corals and their symbiotic partners.

## Methods

We studied coral-Symbiodinium networks to quantify the specificity of corals and Symbiodinium at reef, ocean basin, and global scales, and to explore how specificity correlates with transmission mode. We used data from GeoSymbio, a database of interactions between Symbiodinium and their animal hosts from 79 publications between 1982 and 2010 [34]. Interaction records were filtered to meet several criteria such that the final subset of data was aggregated from 21 publications with data collected between 1998 and 2009. First, only interaction records between hard corals (order Scleractinia identified at the genus and species level) and Symbiodinium (identified by subtype, which corresponds to differences in the Internal Transcribed Spacer Region 2 [ITS2] sequence) were included. Second, we restricted methodology to denaturing gradient gel electrophoresis (DGGE), which identifies the dominant Symbiodinium sequence within a coral sample [51]. Third, we removed any aquarium records. Finally, records were removed if Symbiodinium sequence data were unavailable in GenBank, and together, these criteria minimized methodological differences.

We created coral-Symbiodinium networks at reef, ocean basin, and global scales to study interaction patterns. Coral species and Symbiodinium types were connected in a community's interaction network if a coral species had been recorded as hosting a Symbiodinium type. Mutualistic interaction networks typically represent interactions between species, rather than genera or clades, and we follow this convention as closely as possible given the current taxonomy of Symbiodinium, where ITS2 types are thought to be most closely related to the species designation. As sampling intensities were not recorded within all references, we chose to analyze unweighted networks, which tracks the presence or absence (1 or 0) of interactions, rather than weighted networks, which additionally identifies the strength of interactions.

The interaction data were filtered to create reef-level or local networks. Geographical information for coral-Symbiodinium type associations in GeoSymbio followed a hierarchical framework modified from the Ocean Biogeographic Information System data schema (v1.1). To standardize community sampling effort based on the available data for sub-ocean basin scale networks, sample location levels were examined by A) state-region, B) subregion, and C) locale in the following fashion. Interaction data were included in our analyses if more than 30 interaction records were available at the state-region level, and each of the lower levels were subsequently examined if 30 interactions were available. Thirty interaction records were chosen as a lower threshold for community sampling because of a natural break between poorly sampled and well-sampled communities within GeoSymbio and to correspond to other mutualistic networks. Western Australia and the Exuma Islands, Bahamas were the only maximally-reduced state-region communities. Ocean basin networks were constructed by combining data for only the adequately sampled reef-level networks. The spatial boundaries for the western Indo-Pacific, central Indo-Pacific, and tropical Atlantic are consistent with the biogeographical realms in [52]. La Paz, Oahu, and Zamami Island are not included in the ocean-level analysis due to the lack of data for the associated biogeographical realms.

We created global interaction networks by aggregating only the adequately sampled reef-level networks in GeoSymbio. The first global network included all of the data from the adequately

sampled reef-level networks, while a second global network only included data from well-sampled corals. For inclusion in the well-sampled global interaction network, coral species needed to be sampled at least ten times from at least three different publications to minimize artifacts associated with sampling bias. Symbiodinium types needed to be recorded in at least one of the well-sampled coral species, as poorly-sampled corals could provide an inadequate picture of their symbiont populations, while rare Symbiodinium in well-sampled corals reflect an actual interaction trend. Despite the likelihood that increased sampling effort would increase the number of interactions reported, and that Symbiodinium diversity analyses are a much needed area of research globally, many specialist taxa are particularly well sampled and still have very few associated symbionts (see *Montipora digitata* and *Porites cylindrica*, Fig. 3b), displaying a trend rather than an artifact. Following the data filtering, we quantified the specificity of coral species for Symbiodinium types using descriptive statistics, and examined correlations with previously identified transmission mode (sensu [24]).

The specificity of coral hosts and their symbiont partners was further explored by clustering corals according to their degree (number of interactions) and the mean or median degree of their symbiont partners. We clustered corals using the k-means clustering algorithm, where the number of clusters,  $k$ , is predefined and the algorithm locates cluster means by optimizing the within cluster sum of squares relative to the across cluster sum of squares. The optimal number of clusters was selected conservatively by determining when less than 10% variance, or between cluster sum of squares to total sum of squares, was explained by an additional cluster. Cluster identity was robust to the use of mean or median symbiont degree. Correlations between coral transmission mode [24] and coral interaction number, and mean symbiont interaction number were tested using the Wilcoxon rank-sum test.

The partitioning between horizontally and vertically transmitted symbionts was tested using a modified network assortment metric [53]. Assortment measures the degree to which members of distinct groups interact with one another more or less than expected. For each symbiont in the well-sampled global network, we determined its total number of interactions,  $k$ , its total number of interactions with horizontally transmitting corals,  $k_h$ , and the proportion of horizontally transmitting corals in the community,  $p_h$ . The expected number of interactions with horizontally transmitting corals given random interactions would then be

$$k_{\text{exp}} = k p_h,$$

and the difference between the expected and realized number of interactions is

$$k_{\text{diff}} = k_h - k_{\text{exp}}.$$

Symbionts interact with horizontally transmitting corals more than expected if  $k_{\text{diff}}$  is positive, and interact with vertically transmitting corals more than expected if  $k_{\text{diff}}$  is negative. We then normalize  $k_{\text{diff}}$  based on the maximum or minimum possible value so that  $k_{\text{diff}}$  ranges from 1 (when symbionts only interact with horizontally transmitting corals and  $k_h = k$ ) to  $-1$  (when symbionts only interact with vertically transmitting corals and  $k_h = 0$ ). Thus,

$$k_{diff} = (k_h - k_{exp}) / (k - k_{exp}) \quad \text{when } k_{diff} \geq 0$$

$$k_{diff} = -(k_h - k_{exp}) / (0 - k_{exp}) \quad \text{when } k_{diff} < 0$$

Coral-Symbiodinium network metrics were explored to determine whether general trends exist and how those trends compare to other mutualistic networks. Mutualistic interaction networks are characterized by properties that generally hold across wide geographic scales and interaction types (reviewed in [27,28]). These include: significantly more species in one guild than the other (web asymmetry), a low number of realized interactions (connectance), high levels of nested organization (nestedness, see below), and many specialists versus few generalists. The consistency of these patterns has led to several hypotheses for their existence, including population sizes, optimal behavior, trait matching and barriers, and phylogenetic relationships [28]. Most importantly, these traits may relate to the resilience - the ability to withstand perturbations - of a community under certain stressors [29,30,31].

We calculated web asymmetry, connectance, and nestedness, and created degree distributions for each network [53]. Web asymmetry identifies networks with more coral types,  $c$ , than Symbiodinium types,  $s$ , and is equal to the number of coral species minus the number of Symbiodinium types, divided by the total number of types and species  $((c - s) / (c + s))$ . Positive web asymmetry values indicate more coral species, while negative values indicate more Symbiodinium types. Connectance is the proportion of realized interactions or links,  $l$ , out of the total potential interactions, or the number of interactions divided by the number of coral species times the number of Symbiodinium types  $(l / (c * s))$ . Degree distributions are created by identifying the relative frequency,  $f_d$ , of species with degree  $d$ , or a total of  $d$  interactions.

Nestedness is a measure of order in a community, where high levels of order indicate that the partners of specialists are subsets of the partners of generalists. We calculated nestedness using the overlay and decreasing fill (NODF) method via the *nestednodf()* function in the R package *vegan* ([54], using method = “NODF2”). Nestedness values range between 0 and 100, with greater values indicating greater nestedness. Nestedness values for the actual network were compared to null model expectations [55]. The first null model holds the number of links in a network constant (connectance), while the second assumes the probability of two species interacting is equal to the average of their respective probabilities of interaction. We ran 1000 replicates for each null model and calculated relative nestedness to compare nestedness between networks [56]. Relative nestedness is defined as

$$N * = (N - N_r) / N_r,$$

## References

- Hughes TP, Baird AH, Bellwood DR, Card M, Connolly SR, et al. (2003) Climate change, human impacts, and the resilience of coral reefs. *Science* 301: 929–933.
- Parnesan C (2006) Ecological and evolutionary responses to recent climate change. *Annu Rev Ecol Syst* 34: 637–669.
- Gates RD, Ainsworth TD (2011) The nature and taxonomic composition of coral symbiomes as drivers of performance limits in scleractinian corals. *J Exp Mar Bio Ecol* 408: 94–101.
- Hoegh-Guldberg O (2010) Coral reef ecosystems and anthropogenic change. *Reg Environ Change* 11: S215–S227.
- Douglas AE (2003) Coral bleaching - how and why? *Mar Poll Bull* 46: 385–392.
- Muscantine L, Porter J (1977) Reef corals: mutualistic symbioses adapted to nutrient-poor environments. *Bioscience* 27: 454–460.
- Berkelmans R, van Oppen MJH (2006) The role of zooxanthellae in the thermal tolerance of corals: a “nugget of hope” for coral reefs in an era of climate change. *Proc Royal Soc B* 273: 2305–2312.
- Stat M, Morris E, Gates RD (2008) Functional diversity in coral-dinoflagellate symbiosis. *PNAS* 105: 9256–9261.
- Stat M, Gates RD (2011) Clade D Symbiodinium in scleractinian corals: a “nugget” of hope, a selfish opportunist, an ominous sign, or all of the above? *J Mar Biol* 730715: 1–9.
- Stambler N (2011) Zooxanthellae: the yellow symbionts inside animals. In: *Coral Reefs: an Ecosystem in Transition*. Heidelberg: Springer.
- Pochon X, Gates RD (2010) A new Symbiodinium clade (Dinophyceae) from soritid foraminifera in Hawai'i. *Mol Phylo Evo* 56: 492–497.
- Knowlton N, Rohrer F (2003) Multispecies microbial mutualisms on coral reefs: the host as a habitat. *Am Nat* 162: S51–S62.
- Baker AC (2003) Flexibility and specificity in coral-algal symbiosis: diversity, ecology, and biogeography of Symbiodinium. *Annu Rev Ecol Syst* 34: 661–689.
- Baker AC, Starger CJ, McClanahan TR, Glynn PW (2004) Corals' adaptive response to climate change. *Nature* 430: 741.

Where  $N$  is the NODF2 nestedness value for the actual network and  $N_r$  is the mean NODF2 nestedness value across all null model replicates.

## Supporting Information

**Table S1** Well-sampled coral species from the central Indo-Pacific and western Indo-Pacific. “Trans” = transmission mode; “Syms” = number of symbiont partners; “CIP” = found in central Indo-Pacific; “WIP” = found in western Indo-Pacific; “TA” = found in tropical Atlantic; “Samp” = number of samples; “Refs” = number of references. Transmission codes are “H” = horizontal, “V” = vertical, and “M” = mixed.

(TIFF)

**Table S2** Well-sampled coral species from the tropical Atlantic. “Trans” = transmission mode; “Syms” = number of symbiont partners; “CIP” = found in central Indo-Pacific; “WIP” = found in western Indo-Pacific; “TA” = found in tropical Atlantic; “Samp” = number of samples; “refs” = number of references. Transmission codes are “H” = horizontal, “V” = vertical, and “M” = mixed.

(TIFF)

**Data S1 GeoSymbio data.** Data from GeoSymbio (<https://sites.google.com/site/geosymbio/>) used for analyses.

(CSV)

**Data S2 Transmission mode information.** Transmission mode information from [24].

(CSV)

**Schema S1 Schema for GeoSymbio data (Data S1).**

(CSV)

**References S1 References for GeoSymbio data (Data S1).**

(CSV)

## Acknowledgments

Raw data are found at the GeoSymbio database (<https://sites.google.com/site/geosymbio/>). We thank JM Abbott, GM Coop, AE Douglas, AR Ives, X Pochon, SJ Schreiber, JJ Stachowicz, and three anonymous reviewers for insight and comments. This is HIMB contribution 1511 and SOEST contribution 8726.

## Author Contributions

Conceived and designed the experiments: NSF HMP ECF MS RDG. Performed the experiments: NSF HMP ECF MS. Analyzed the data: NSF. Contributed reagents/materials/analysis tools: RDG. Wrote the paper: NSF HMP ECF MS RDG.



15. Oliver TA, Palumbi SR (2009) Distributions of stress-resistant coral symbionts match environmental patterns at local but not regional scales. *Mar Ecol Prog Ser* 378: 93–103.
16. Oliver TA, Palumbi SR (2011) Many corals host thermally resistant symbionts in high-temperature habitat. *Coral Reefs* 30: 241–250.
17. Rowan R (2004) Thermal adaptation in reef coral symbionts. *Nature* 430: 742.
18. Little AF, van Oppen MJH, Willis BL (2004) Flexibility in algal endosymbioses shapes growth in reef corals. *Science* 304: 1492–1494.
19. Cantin NE, van Oppen MJH, Willis BL, Micog JC, Negri AP (2009) Juvenile corals can acquire more carbon from high-performance algal symbionts. *Coral Reefs* 28: 405–414.
20. Buddemeier RW, Fautin DG (1993) Coral bleaching as an adaptive mechanism. *BioScience* 43: 320–326.
21. Fautin DG, Buddemeier RW (2004) Adaptive bleaching: a general phenomenon. *Hydrobiologia* 530: 459–467.
22. Venn AA, Loram JE, Trapido-Rosenthal HG, Joyce DA, Douglas AE (2008) Importance of time and place: patterns in abundance of *Symbiodinium* clades A and B in the tropical sea anemone *Condylactis gigantea*. *Biol Bull* 215: 243–252.
23. Freeman CJ, Thacker RW (2011) Complex interactions between marine sponges and their symbiotic microbial communities. *Limnol Oceanogr* 56: 1577–1586.
24. Baird AH, Guest JR, Willis BL (2009) Systematic and biogeographical patterns in the reproductive biology of *Scleractinian* corals. *Annu Rev Ecol Syst* 40: 551–571.
25. Douglas AE (1998) Host benefit and the evolution of specialization in symbiosis. *Heredity* 81: 599–603.
26. Douglas AE (2010) *The Symbiotic Habit*. Princeton: Princeton University Press.
27. Bascompte J (2009) Mutualistic Networks. *Front Ecol Environ* 7: 429–436.
28. Vázquez DP, Blüthgen N, Cagnolo L, Chacoff NP (2009) Uniting pattern and process in plant-animal mutualistic networks: a review. *Ann Bot* 103: 1445–1457.
29. Aizen MA, Morales CL, Morales JM (2008) Invasive mutualists erode native pollination webs. *PLoS Bio* 6: e31.
30. Okuyama T, Holland JN (2008) Network structural properties mediate the stability of mutualistic communities. *Ecol Lett* 11: 208–216.
31. Kaiser-Bunbury CN, Memmott J, Müller CB (2009) Community structure of pollination webs of Mauritian heathland habitats. *Persp Plant Ecol Evol and Syst* 11: 241–254.
32. Ives AR, Carpenter SR (2009) Stability and diversity of ecosystems. *Science* 317: 58–62.
33. Blüthgen N, Menzel F, Hovestadt T, Fiala B, Blüthgen N (2007) Specialization, constraints, and conflicting interests in mutualistic networks. *Curr Biol* 17: 341–346.
34. Franklin EC, Stat M, Pochon X, Putnam HM, Gates RD (2012) GeoSymbio: a hybrid, cloud-based web application of global geospatial bioinformatics and ecoinformatics for *Symbiodinium*-host symbioses. *Mol Ecol Res* 12: 369–373. doi: 10.1111/j.1755-0998.2011.03081.x.
35. Palmer TM, Stanton ML, Young TP (2003) Competition and coexistence: exploring mechanisms that restrict and maintain diversity within mutualist guilds. *Am Nat* 162: S63–S79.
36. Putnam HM, Stat M, Pochon X, Gates RD (2012) Endosymbiotic flexibility associates with environmental sensitivity in scleractinian corals. *Proc Royal Soc B*. In press.
37. Loya Y, Sakai K, Nakano Y, Sambali H, van Woesik R (2001) Coral bleaching: the winners and the losers. *Ecol Lett* 4: 122–131.
38. van Woesik R, Sakai K, Ganase A, Loya Y (2011) Revisiting the winners and the losers a decade after coral bleaching. *Mar Ecol Prog Ser* 434: 67–76.
39. Marshall PA, Baird AH (2000) Bleaching of corals on the Great Barrier Reef: differential susceptibilities among taxa. *Coral Reefs* 19: 155–163.
40. LaJeunesse TC, Loh WKW, van Woesik R, Hoegh-Guldberg O, Schmidt GW, et al. (2003) Low symbiont diversity in southern GBR corals relative to those of the Caribbean. *Limnol Oceanogr* 48: 2046–2054.
41. Sampayo EM, Franceschini L, Hoegh-Guldberg O, Dove S (2007) Niche partitioning of closely related symbiotic dinoflagellates. *Mol Ecol* 16: 3721–3733.
42. van Oppen MJH (2004) Mode of zooxanthellae transmission does not affect zooxanthellae diversity in acroporid corals. *Mar Biol* 144: 1–7.
43. Wicks LC, Sampayo E, Gardner JPA, Davy SK (2010) Local endemism and high diversity characterize high-latitude coral-*Symbiodinium* partnerships. *Coral Reefs* 29: 989–1003.
44. Stat M, Loh WKW, Hoegh-Guldberg O, Carter DA (2008) Symbiont acquisition strategy drives host-symbiont associations in the southern Great Barrier Reef. *Coral Reefs* 27: 763–772.
45. Apprill AM, Gates RD (2007) Recognizing diversity in coral symbiotic dinoflagellate communities. *Mol Ecol* 16: 1127–1134.
46. Correa AMS, Baker AC (2009) Understanding diversity in coral-algal symbiosis: a cluster-based approach to interpreting fine-scale genetic variation in the genus *Symbiodinium*. *Coral Reefs* 28: 81–93.
47. Sampayo EM, Dove S, LaJeunesse TC (2009) Cohesive molecular genetic data delineate species diversity in the dinoflagellate genus *Symbiodinium*. *Mol Ecol* 18: 500–519.
48. Olesen J, Bascompte J, Elberling H, Jordano P (2008) Temporal dynamics in a pollination network. *Ecology* 89: 1573–1582.
49. Petanidou T, Kallimanis AS, Tzanopoulos J, Sgardelis SP, Pantis JD (2008) Long-term observation of a pollination network: fluctuation in species and interactions, relative invariance of network structure and implications for estimates of specialization. *Ecol Lett* 11: 564–575.
50. Bosch J, González AMM, Rodrigo A, Navarro D (2009) Plant-pollinator networks: adding the pollinator's perspective. *Ecol Lett* 12: 409–419.
51. LaJeunesse TC (2001) Investigating the biodiversity, ecology, and phylogeny of endosymbiotic dinoflagellates in the genus *Symbiodinium* using the ITS region: in search of a “species” level marker. *J Phycol* 37: 866–880.
52. Spalding MD, Fox HE, Allen GR, Davidson N, Ferdaña ZA, et al. (2007) Marine ecoregions of the world: a bioregionalization of coastal and shelf areas. *Bioscience* 57: 573–583.
53. Newman MEJ (2010) *Networks: an Introduction*. Oxford: Oxford Publishing.
54. Oksanen J, Blanchet FG, Kindt R, Legendre P, O'Hara RB, et al. (2011) *vegan: Community Ecology Package*. R package version 1. 17–10.
55. Guimarães PR, Sazima C, dos Reis CF, Sazima I (2007) The nested structure of marine cleaning symbiosis: is it like flowers and bees? *Biol Lett* 3: 51–54.
56. Bascompte J, Jordano P, Melian CP, Olesen JM (2003) The nested assembly of plant-animal mutualistic networks. *PNAS* 100: 9383–9387.
